# Supplementary material for: Potential color tunable Sr3LaNa(PO4)3F:Eu2+/Tb3+/Mn2+phosphor induced by Eu2+→ Tb3+and Tb3+→ Mn2+energy transfer for WLEDs
Source: Royal Society of Chemistry journal article supplement (doi:10.1039/c7cp04691j), 2017-01-01
Supplement: c7cp04691j1.pdf [file c7cp04691j1.pdf]

## **Supplementary Information**

**Title:** Potential color tunable  $\text{Sr}_3\text{LaNa}(\text{PO}_4)_3\text{F}:\text{Eu}^{2+}/\text{Tb}^{3+}/\text{Mn}^{2+}$  phosphor induced by  $\text{Eu}^{2+} \rightarrow \text{Tb}^{3+}$  and  $\text{Tb}^{3+} \rightarrow \text{Mn}^{2+}$  energy transfer for WLEDs

**Author(s):** Mengmeng Jiao,<sup>a</sup> Chuanlu Yang,<sup>a\*</sup> Yalin Li,<sup>a</sup> Dongxu Wang,<sup>a</sup> Hongpeng You<sup>b\*</sup>

<sup>a</sup> School of Physics and Optoelectronic Engineering, Ludong University, Yantai 264025, China,

<sup>b</sup> State Key Laboratory of Rare Earth Resource Utilization, Changchun Institute of Applied Chemistry, Chinese Academy of Sciences, Changchun 130022, P. R. China.

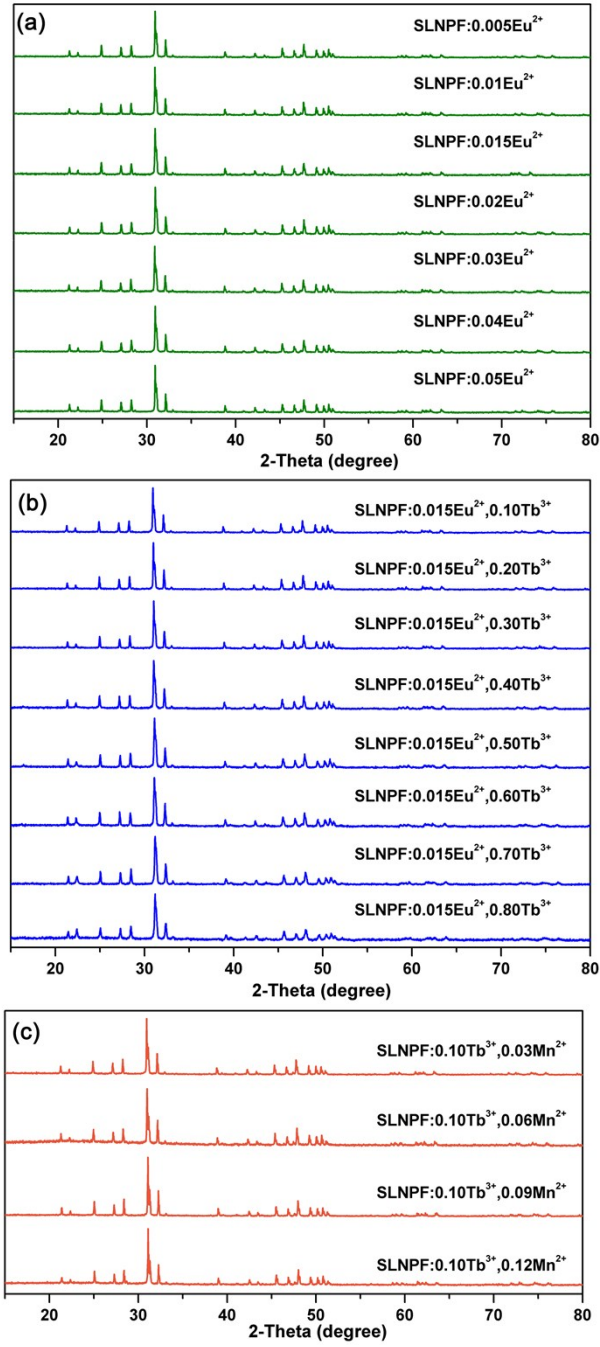

**Fig. S1.** XRD patterns of the prepared (a) SLNPF: $x\text{Eu}^{2+}$  ( $x = 0.005-0.05$ ), (b) SLNPF: $0.015\text{Eu}^{2+},y\text{Tb}^{3+}$  ( $y = 0.10-0.80$ ), and (c) SLNPF:  $0.10\text{Tb}^{3+},z\text{Mn}^{2+}$  ( $z = 0.03-0.12$ ) phosphors.

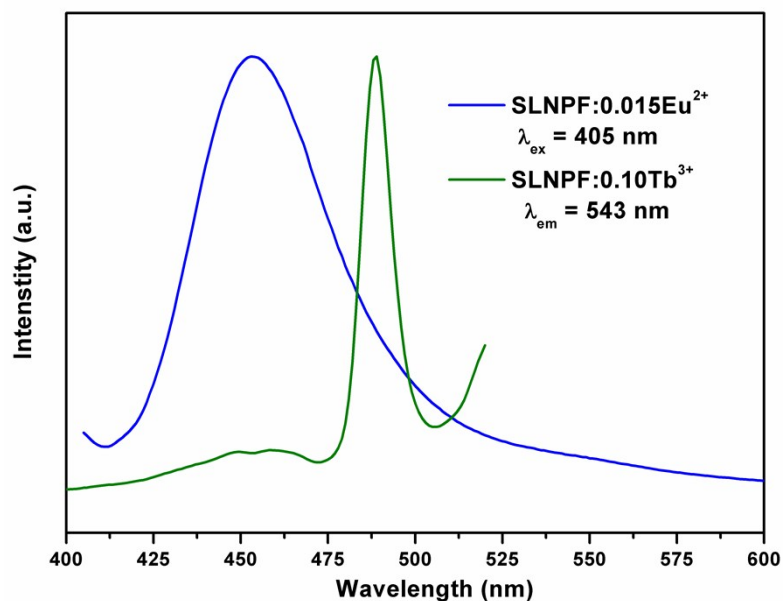

**Fig. S2.** Spectra overlap between the PL of SLNPF:0.015Eu<sup>2+</sup> and PLE of SLNPF:0.10Tb<sup>3+</sup> phosphors.

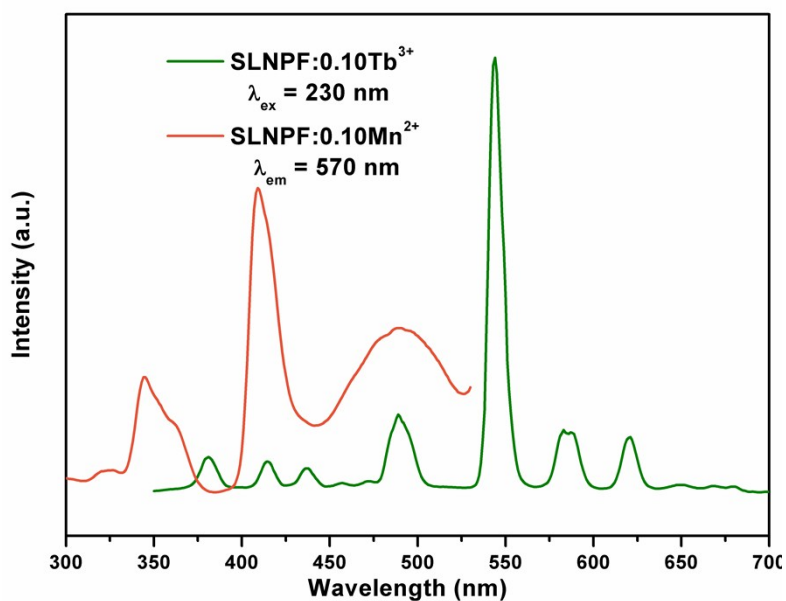

**Fig. S3.** Spectra overlap between the PL of SLNPF: 0.10Tb<sup>3+</sup> and PLE of SLNPF:0.10Mn<sup>2+</sup> phosphors.

**Table S1.** Final refined structure parameters of SLNPF:0.015Eu<sup>2+</sup> derived from the

| Rietveld refinement of X-ray diffraction data                              |                         |            |            |            |       |       |
|----------------------------------------------------------------------------|-------------------------|------------|------------|------------|-------|-------|
| Atom                                                                       | Wyckof<br>f<br>position | x          | Y          | z          | Frac  | Uiso  |
| La1                                                                        | 2d                      | 0.33330(0) | 0.66670(0) | 0.51470(5) | 1.00  | 0.025 |
| Na1                                                                        | 2d                      | 0.33330(0) | 0.66670(0) | 0.01900(9) | 1.00  | 0.025 |
| Sr1                                                                        | 6g                      | 0.23666(6) | 0.25268(5) | 0.26139(0) | 0.985 | 0.025 |
| P1                                                                         | 6g                      | 0.36318(5) | 0.39873(5) | 0.73642(6) | 1.00  | 0.025 |
| O1                                                                         | 6g                      | 0.48709(0) | 0.33111(9) | 0.61328(5) | 1.00  | 0.025 |
| O2                                                                         | 6g                      | 0.47189(3) | 0.57269(9) | 0.67450(6) | 1.00  | 0.025 |
| O3                                                                         | 6g                      | 0.26435(5) | 0.34355(2) | 0.88723(4) | 1.00  | 0.025 |
| O4                                                                         | 6g                      | 0.26867(5) | 0.33649(4) | 0.54597(5) | 1.00  | 0.025 |
| F1                                                                         | 2c                      | 0.0000     | 0.0000     | 0.16917(2) | 1.00  | 0.025 |
| Eu1                                                                        | 6g                      | 0.23666(6) | 0.25268(5) | 0.26139(0) | 0.015 | 0.025 |
| Cell parameters: $a = b = 9.6749(0)$ Å, $c = 7.1780(6)$ Å,                 |                         |            |            |            |       |       |
| $V = 581.877$ Å <sup>3</sup> ; $Z = 2$ ;                                   |                         |            |            |            |       |       |
| space group: $P-3$ (no.147);                                               |                         |            |            |            |       |       |
| Reliability factors: $\chi^2 = 8.839$ , $R_{wp} = 8.41\%$ , $R_p = 5.92\%$ |                         |            |            |            |       |       |

**Table S2.** CIE coordinates of SLNPF:Eu<sup>2+</sup>/Mn<sup>2+</sup>/Tb<sup>3+</sup> samples

| No. | Sample composition                                | CIE coordinates (x, y) |
|-----|---------------------------------------------------|------------------------|
| 1   | SLNPF:0.015Eu <sup>2+</sup>                       | (0.190,0.159)          |
| 2   | SLNPF:0.10Tb <sup>3+</sup>                        | (0.325,0.573)          |
| 3   | SLNPF:0.10Mn <sup>2+</sup>                        | (0.475,0.462)          |
| 4   | SLNPF:0.015Eu <sup>2+</sup> ,0.10Tb <sup>3+</sup> | (0.212,0.233)          |
| 5   | SLNPF:0.015Eu <sup>2+</sup> ,0.20Tb <sup>3+</sup> | (0.229,0.293)          |
| 6   | SLNPF:0.015Eu <sup>2+</sup> ,0.30Tb <sup>3+</sup> | (0.245,0.344)          |
| 7   | SLNPF:0.015Eu <sup>2+</sup> ,0.40Tb <sup>3+</sup> | (0.259,0.386)          |
| 8   | SLNPF:0.015Eu <sup>2+</sup> ,0.50Tb <sup>3+</sup> | (0.272,0.418)          |
| 9   | SLNPF:0.015Eu <sup>2+</sup> ,0.60Tb <sup>3+</sup> | (0.283,0.445)          |
| 10  | SLNPF:0.015Eu <sup>2+</sup> ,0.70Tb <sup>3+</sup> | (0.292,0.468)          |
| 11  | SLNPF:0.015Eu <sup>2+</sup> ,0.80Tb <sup>3+</sup> | (0.299,0.479)          |
| 12  | SLNPF:0.10Tb <sup>3+</sup> ,0.03Mn <sup>2+</sup>  | (0.380,0.511)          |
| 13  | SLNPF:0.10Tb <sup>3+</sup> ,0.06Mn <sup>2+</sup>  | (0.427,0.491)          |
| 14  | SLNPF:0.10Tb <sup>3+</sup> ,0.09Mn <sup>2+</sup>  | (0.459,0.475)          |
| 15  | SLNPF:0.10Tb <sup>3+</sup> ,0.12Mn <sup>2+</sup>  | (0.477,0.461)          |
